# Supplementary material for: From symptom to cancer diagnosis: Perspectives of patients and family members in Alberta, Canada
Source: PubMed Central journal article supplement (PMC7514000; doi:10.1371/journal.pone.0239374), 2020-09-24

# PLOS ONE

## From symptom to cancer diagnosis: Perspectives of patients and family members in Alberta, Canada --Manuscript Draft--

|                                                                                                                                                                                                                                                                                |                                                                                                                                                                                                                                                                                                                                                                                                                                                                                                                                                                                                                                                                                                                                                                                                                                                                                                                                                                                                                                                                                                                                                                                                                                                                                                                                                                                                                                                                                                                                   |
|--------------------------------------------------------------------------------------------------------------------------------------------------------------------------------------------------------------------------------------------------------------------------------|-----------------------------------------------------------------------------------------------------------------------------------------------------------------------------------------------------------------------------------------------------------------------------------------------------------------------------------------------------------------------------------------------------------------------------------------------------------------------------------------------------------------------------------------------------------------------------------------------------------------------------------------------------------------------------------------------------------------------------------------------------------------------------------------------------------------------------------------------------------------------------------------------------------------------------------------------------------------------------------------------------------------------------------------------------------------------------------------------------------------------------------------------------------------------------------------------------------------------------------------------------------------------------------------------------------------------------------------------------------------------------------------------------------------------------------------------------------------------------------------------------------------------------------|
| <b>Manuscript Number:</b>                                                                                                                                                                                                                                                      | PONE-D-20-12776                                                                                                                                                                                                                                                                                                                                                                                                                                                                                                                                                                                                                                                                                                                                                                                                                                                                                                                                                                                                                                                                                                                                                                                                                                                                                                                                                                                                                                                                                                                   |
| <b>Article Type:</b>                                                                                                                                                                                                                                                           | Research Article                                                                                                                                                                                                                                                                                                                                                                                                                                                                                                                                                                                                                                                                                                                                                                                                                                                                                                                                                                                                                                                                                                                                                                                                                                                                                                                                                                                                                                                                                                                  |
| <b>Full Title:</b>                                                                                                                                                                                                                                                             | From symptom to cancer diagnosis: Perspectives of patients and family members in Alberta, Canada                                                                                                                                                                                                                                                                                                                                                                                                                                                                                                                                                                                                                                                                                                                                                                                                                                                                                                                                                                                                                                                                                                                                                                                                                                                                                                                                                                                                                                  |
| <b>Short Title:</b>                                                                                                                                                                                                                                                            | Perspectives about the cancer diagnosis period                                                                                                                                                                                                                                                                                                                                                                                                                                                                                                                                                                                                                                                                                                                                                                                                                                                                                                                                                                                                                                                                                                                                                                                                                                                                                                                                                                                                                                                                                    |
| <b>Corresponding Author:</b>                                                                                                                                                                                                                                                   | Anna Pujadas Botey<br>Alberta Health Services<br>Calgary, Alberta CANADA                                                                                                                                                                                                                                                                                                                                                                                                                                                                                                                                                                                                                                                                                                                                                                                                                                                                                                                                                                                                                                                                                                                                                                                                                                                                                                                                                                                                                                                          |
| <b>Keywords:</b>                                                                                                                                                                                                                                                               | oncology; cancer care; diagnosis period; self-advocacy; supportive care needs; qualitative research                                                                                                                                                                                                                                                                                                                                                                                                                                                                                                                                                                                                                                                                                                                                                                                                                                                                                                                                                                                                                                                                                                                                                                                                                                                                                                                                                                                                                               |
| <b>Abstract:</b>                                                                                                                                                                                                                                                               | <p><b>BACKGROUND:</b> Significant intervals from the identification of suspicious symptoms to a definitive diagnosis of cancer are common. Streamlining pathways to diagnosis may increase survival, quality of life post-treatment, and patient experience. Discussions of pathways to diagnosis from the perspective of patients and family members are crucial to advancing cancer diagnosis.</p> <p><b>AIM:</b> To examine the perspectives of a group of patients with cancer and family members in Alberta, Canada, on factors associated with timelines to diagnosis and overall experience.</p> <p><b>METHODS:</b> A qualitative approach was used. In-depth, semi-structured interviews with patients with cancer (n=18) and patient relatives (n=5) were conducted and subjected to a thematic analysis.</p> <p><b>FINDINGS:</b> Participants struggled emotionally. Relevant to their experience were: potentially avoidable delays, concerns about health status, and misunderstood investigation process. Participants emphasized the importance of their active involvement in the care process, and had unmet supportive care needs.</p> <p><b>CONCLUSION:</b> Psychosocial supports available to potential cancer patients and their families are minimal and crucial for improved experiences before diagnosis. Access to other patients' lived experiences with the diagnostic process and with cancer, and an enhanced supportive role of family doctors might improve outcomes for patients and families.</p> |
| <b>Order of Authors:</b>                                                                                                                                                                                                                                                       | <p>Anna Pujadas Botey</p> <p>Paula J. Robson</p> <p>Adam M. Hardwicke-Brown</p> <p>Dorothy M. Rodehutsors</p> <p>Barbara M. O'Neill</p> <p>Douglas A. Stewart</p>                                                                                                                                                                                                                                                                                                                                                                                                                                                                                                                                                                                                                                                                                                                                                                                                                                                                                                                                                                                                                                                                                                                                                                                                                                                                                                                                                                 |
| <b>Additional Information:</b>                                                                                                                                                                                                                                                 |                                                                                                                                                                                                                                                                                                                                                                                                                                                                                                                                                                                                                                                                                                                                                                                                                                                                                                                                                                                                                                                                                                                                                                                                                                                                                                                                                                                                                                                                                                                                   |
| <b>Question</b>                                                                                                                                                                                                                                                                | <b>Response</b>                                                                                                                                                                                                                                                                                                                                                                                                                                                                                                                                                                                                                                                                                                                                                                                                                                                                                                                                                                                                                                                                                                                                                                                                                                                                                                                                                                                                                                                                                                                   |
| <b>Financial Disclosure</b>                                                                                                                                                                                                                                                    | The authors received no specific funding for this work.                                                                                                                                                                                                                                                                                                                                                                                                                                                                                                                                                                                                                                                                                                                                                                                                                                                                                                                                                                                                                                                                                                                                                                                                                                                                                                                                                                                                                                                                           |
| Enter a financial disclosure statement that describes the sources of funding for the work included in this submission. Review the <a href="#">submission guidelines</a> for detailed requirements. View published research articles from <a href="#">PLOS ONE</a> for specific |                                                                                                                                                                                                                                                                                                                                                                                                                                                                                                                                                                                                                                                                                                                                                                                                                                                                                                                                                                                                                                                                                                                                                                                                                                                                                                                                                                                                                                                                                                                                   |

examples.

This statement is required for submission and **will appear in the published article** if the submission is accepted. Please make sure it is accurate.

#### Unfunded studies

Enter: *The author(s) received no specific funding for this work.*

#### Funded studies

Enter a statement with the following details:

- Initials of the authors who received each award
- Grant numbers awarded to each author
- The full name of each funder
- URL of each funder website
- Did the sponsors or funders play any role in the study design, data collection and analysis, decision to publish, or preparation of the manuscript?
- **NO** - Include this sentence at the end of your statement: *The funders had no role in study design, data collection and analysis, decision to publish, or preparation of the manuscript.*
- **YES** - Specify the role(s) played.

\* typeset

#### Competing Interests

Use the instructions below to enter a competing interest statement for this submission. On behalf of all authors, disclose any [competing interests](#) that could be perceived to bias this work—acknowledging all financial support and any other relevant financial or non-financial competing interests.

This statement **will appear in the published article** if the submission is accepted. Please make sure it is accurate. View published research articles from [PLOS ONE](#) for specific examples.

The authors have declared that no competing interests exist.

**NO authors have competing interests**

Enter: *The authors have declared that no competing interests exist.*

**Authors with competing interests**

Enter competing interest details beginning with this statement:

*I have read the journal's policy and the authors of this manuscript have the following competing interests: [insert competing interests here]*

\* typeset

**Ethics Statement**

Enter an ethics statement for this submission. This statement is required if the study involved:

- Human participants
- Human specimens or tissue
- Vertebrate animals or cephalopods
- Vertebrate embryos or tissues
- Field research

Write "N/A" if the submission does not require an ethics statement.

General guidance is provided below. Consult the [submission guidelines](#) for detailed instructions. **Make sure that all information entered here is included in the Methods section of the manuscript.**

The study was conducted with written ethics approval granted by the Health Research Ethics Board of Alberta –Cancer Committee (Study ID: HREBA.CC-18-0210).

**Format for specific study types**

**Human Subject Research (involving human participants and/or tissue)**

- Give the name of the institutional review board or ethics committee that approved the study
- Include the approval number and/or a statement indicating approval of this research
- Indicate the form of consent obtained (written/oral) or the reason that consent was not obtained (e.g. the data were analyzed anonymously)

**Animal Research (involving vertebrate animals, embryos or tissues)**

- Provide the name of the Institutional Animal Care and Use Committee (IACUC) or other relevant ethics board that reviewed the study protocol, and indicate whether they approved this research or granted a formal waiver of ethical approval
- Include an approval number if one was obtained
- If the study involved *non-human primates*, add *additional details* about animal welfare and steps taken to ameliorate suffering
- If anesthesia, euthanasia, or any kind of animal sacrifice is part of the study, include briefly which substances and/or methods were applied

**Field Research**

Include the following details if this study involves the collection of plant, animal, or other materials from a natural setting:

- Field permit number
- Name of the institution or relevant body that granted permission

**Data Availability**

Authors are required to make all data underlying the findings described fully available, without restriction, and from the time of publication. PLOS allows rare exceptions to address legal and ethical concerns. See the [PLOS Data Policy](#) and [FAQ](#) for detailed information.

No - some restrictions will apply

A Data Availability Statement describing where the data can be found is required at submission. Your answers to this question constitute the Data Availability Statement and **will be published in the article**, if accepted.

**Important:** Stating 'data available on request from the author' is not sufficient. If your data are only available upon request, select 'No' for the first question and explain your exceptional situation in the text box.

Do the authors confirm that all data underlying the findings described in their manuscript are fully available without restriction?

**Describe where the data may be found in full sentences. If you are copying our sample text, replace any instances of XXX with the appropriate details.**

- If the data are **held or will be held in a public repository**, include URLs, accession numbers or DOIs. If this information will only be available after acceptance, indicate this by ticking the box below. For example: *All XXX files are available from the XXX database (accession number(s) XXX, XXX).*
- If the data are all contained **within the manuscript and/or Supporting Information files**, enter the following: *All relevant data are within the manuscript and its Supporting Information files.*
- If neither of these applies but you are able to provide **details of access elsewhere**, with or without limitations, please do so. For example:

*Data cannot be shared publicly because of [XXX]. Data are available from the XXX Institutional Data Access / Ethics Committee (contact via XXX) for researchers who meet the criteria for access to confidential data.*

*The data underlying the results presented in the study are available from (include the name of the third party*

All relevant data are within the manuscript. Further data excerpts are available on request from the corresponding author.

*and contact information or URL).*

- This text is appropriate if the data are owned by a third party and authors do not have permission to share the data.

\* typeset

Additional data availability information:

1

2

**3 From symptom to cancer diagnosis: Perspectives of patients and family members in Alberta, Canada**

4

Perspectives about the cancer diagnosis period

5

6

7 Anna Pujadas Botey<sup>1,2\*</sup>, Paula J. Robson<sup>2,3</sup>, Adam M. Hardwicke-Brown<sup>3</sup>, Dorothy M. Rodehutsors<sup>4</sup>,

8

Barbara M. O'Neill<sup>3</sup>, Douglas A. Stewart<sup>1,5</sup>

9

10

11 <sup>1</sup>Cancer Strategic Clinical Network, Alberta Health Services. Calgary, Alberta, Canada

12

13 <sup>2</sup>School of Public Health, University of Alberta. Edmonton, Alberta, Canada

14

15 <sup>3</sup>Cancer Strategic Clinical Network, Alberta Health Services. Edmonton, Alberta, Canada

16

17 <sup>4</sup>CancerControl Alberta, Alberta Health Services, Calgary, Alberta, Canada

18

19 <sup>5</sup>Departments of Oncology and Medicine, University of Calgary, Calgary, Alberta, Canada

20

21

22 \* Corresponding author:

23

E-mail: [Anna.PujadasBotey@ahs.ca](mailto:Anna.PujadasBotey@ahs.ca) (APB)

24

## 25 Abstract

26 BACKGROUND: Significant intervals from the identification of suspicious symptoms to a definitive  
27 diagnosis of cancer are common. Streamlining pathways to diagnosis may increase survival, quality of  
28 life post-treatment, and patient experience. Discussions of pathways to diagnosis from the perspective  
29 of patients and family members are crucial to advancing cancer diagnosis.

30 AIM: To examine the perspectives of a group of patients with cancer and family members in Alberta,  
31 Canada, on factors associated with timelines to diagnosis and overall experience.

32 METHODS: A qualitative approach was used. In-depth, semi-structured interviews with patients with  
33 cancer (n=18) and patient relatives (n=5) were conducted and subjected to a thematic analysis.

34 FINDINGS: Participants struggled emotionally. Relevant to their experience were: potentially avoidable  
35 delays, concerns about health status, and misunderstood investigation process. Participants emphasized  
36 the importance of their active involvement in the care process, and had unmet supportive care needs.

37 CONCLUSION: Psychosocial supports available to potential cancer patients and their families are minimal  
38 and crucial for improved experiences before diagnosis. Access to other patients' lived experiences with  
39 the diagnostic process and with cancer, and an enhanced supportive role of family doctors might  
40 improve outcomes for patients and families.

41

## 42 Introduction

43 Cancer is the leading cause of death in Canada [1]. About half of Canadians will develop cancer in their  
44 lifetime, and about one-fourth will die of the disease [2]. Evidence suggests that diagnosing cancer at  
45 earlier stages may be associated with improvements in survival [3].

46



47 Significant intervals from first noticing a symptom to receiving a cancer diagnosis (known as the  48 diagnostic period) have been widely documented in the literature [4, 5], and related to later stages at 49 diagnosis, as well as suboptimal survival, quality of life post-treatment and patient experience [3, 6]. In 50 Alberta, analyses of administrative data spanning 2004-2011 described potentially preventable long 51 periods from suspicion to diagnosis for breast, colorectal, and lung cancers [7-10]. In Canada and across 52 the world there are substantial variations in the length of the diagnostic period for different cancers [4, 53 11], and numerous studies have focused on understanding factors that may influence this timeline in 54 order to improve health outcomes and patient experience [12].

55  
56 The importance of discussing the path to diagnosis from the perspective of patients and family members 57 is increasingly acknowledged in the literature [13]. Receiving a cancer diagnosis is often preceded by a 58 period of waiting for a diagnosis following the discovery of symptoms, which is anxiety-provoking [14]. 59 The psychosocial impacts of the wait may be accentuated if patients believe there have been 60 inefficiencies in their pathway to diagnosis. In Canada, discussions to advance cancer diagnosis are 61 mostly based on timeline-related information available in administrative databases [9, 10], and not so 62 much on perceived timelines and patient and family experiences [6, 15]. This study was designed to 63 contribute to filling that gap. The objective was to examine the perspectives of a group of patients and 64 family members in Alberta, Canada, on factors associated with timelines to diagnosis and overall patient 65 and family experience. Learning more about perceptions and experiences in the diagnostic period may 66 help inform the development of interventions to minimize stress and improve satisfaction with care, 67 which may have a significant impact on wellbeing [16].

68

## 69 Methods

### 70 Participants

71 Participants were associated with the Patient & Family Advisor Network (PFAN) of CancerControl Alberta  
72 (Alberta Health Services). PFAN is a community of people who are committed to using their experiences  
73 to help improve the health system. Participants in this study were patients with cancer or relatives of  
74 patients with cancer who had received a cancer diagnosis within the last three years, and were living in  
75 Alberta at the time of diagnosis.

76  
77 To recruit participants, the PFAN coordinator sent all PFAN members an electronic engagement request  
78 inviting expressions of interest in participating in the study. The PFAN coordinator then sent interested  
79 members an email with information about the study and a screening questionnaire for them to  
80 complete. Responses from the questionnaire were used to purposefully select participants with 

81 different types of cancer, within different sex and age ranges, assigned to curative or non-curative  
82 treatment, and residing across Alberta (rural and urban) to ensure a variety of cancer experiences [17].

83 The PFAN coordinator invited selected participants to be part of the study and sent them an email that  
84 included a consent form to be reviewed prior to the interview. Additional participants were invited to  
85 participate in the study until data saturation was reached [17]. In total, 20 interviews were conducted;  
86 with the participation of 18 patients and five family members.

### 87 Procedure

88 The framework used for the study was 'Model of Pathways to Treatment' [18-20]. It identifies four  
89 intervals from suspicion of a health problem to receiving treatment: 1) from detection of symptoms to  
90 perceiving a reason to discuss symptoms with a healthcare provider (*appraisal*); 2) from perceiving a  
91 reason to discuss symptoms with a healthcare provider to first consultation (*help-seeking*); 3) from first

92 consultation to formal diagnosis, including the initiation of investigation, prescription of tests,  
93 examinations, and diagnosis (*diagnosis*); and, 4) from formal diagnosis to start of treatment (*pre-*  
94 *treatment*) [19]. The study covers the first three intervals, referred to collectively as the diagnostic  
95 period.

96  
97 The study used a qualitative research approach [17, 21]. This method was selected to facilitate  
98 exploration of perspectives and experiences to capture new insights that may inform how to improve  
99 experiences during cancer diagnosis, complementing the previous quantitative approaches undertaken  
100 in Alberta. In-depth, semi-structured interviews were used for data collection. Interviews followed an  
101 interview guide that was developed in close collaboration with PFAN leadership and with feedback from  
102 patient advisors affiliated with the Cancer Strategic Clinical Network (S1 and S2 Appendices). Using  
103 accepted qualitative research standards [22], pilot interviews were conducted with four patients with  
104 cancer to ensure the interview guide answered the proposed research objective. The interview guide  
105 covered topics such as how participants made sense of their symptoms, why they chose to visit a  
106 healthcare provider and how they experienced going through appointments, referrals, and tests before  
107 they were provided with a definitive cancer diagnosis. It also included a section on recommendations for  
108 improvement including the need for emotional support during the diagnostic period.

109  
110 The study was conducted with written ethics approval granted by the Health Research Ethics Board of  
111 Alberta –Cancer Committee (Study ID: HREBA.CC-18-0210). Interviews were conducted by APB, a  
112 qualitative researcher by background, with a PhD in social sciences, with interest in the diagnostic  
113 period and no previous work in the area with patients or family relatives. She was involved in the early  
114 development of the study, and had no prior relationship or sharing of personal information with the  
115 participants approached for interview. Interviews were conducted face-to-face at a time and location

116 convenient for each participant. Most participants were interviewed in a room at their closest cancer  
117 centre, and three in a meeting room in the facility where the PFAN coordinator worked. In one case it  
118 was not possible to find a convenient location and the interview was conducted through  
119 videoconference. There was no presence of non-participants during the interviews. Before proceeding  
120 with each interview, participants were invited to sign the consent form that they had received from the  
121 PFAN coordinator by email. Interviews took place between June 26 and September 7, 2018, and lasted  
122 an average of 41 minutes (range 29-88 minutes). During each interview the researcher took field notes  
123 to maintain contextual details and non-verbal expressions. All interviews were audio-recorded and  
124 subsequently transcribed verbatim. To protect the identity of participants, at the transcription stage  
125 each interview was assigned an identification number and any identifying information was deleted.

## 126 **Analysis**

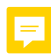

127 Interview transcripts were imported into NVivo Version 11 (QSR International, Australia). Transcripts  
128 were thematically analyzed using an inductive data-driven coding process to reflect on how participants  
129 made meaning of their experiences without predetermined theories [23]. This process entailed a  
130 methodological review of the full text of each interview transcript to detect recurrent themes that were  
131 then organized into a set of codes that were systematically applied to fragments of text [21]. The  
132 researcher who conducted the interviews did all of the coding. To ensure consistency and  
133 trustworthiness [23], a second researcher coded randomly-selected segments of text. The two  
134 researchers discussed their interpretation and codes until they reached consensus. To increase validity,  
135 participants were sent research findings and given the opportunity to provide feedback (by email or  
136 phone), and findings and feedback were validated in a subsequent group discussion with eight patients  
137 with cancer [23].

138

## 139 Results

140 Patients with cancer and family members who participated in the study represented ten different  
141 cancers, 74% of them were women (n=17), their median age was 59 years (range 42-76), 70% resided in  
142 urban locations (n=16), 65% of patients had been treated with curative intent (n=15), and the median  
143 time between the date of diagnosis and the date of the interview was 19 months (range 2-36).

144 Participants had diverse experiences during the diagnostic period, but some commonalities exist.

145 Thematic analysis revealed three salient themes as being relevant to their experience (S3 Fig):

146 potentially avoidable delays, concerns about health status, and misunderstood investigation process.

147 Participants struggled emotionally in the period between identifying symptoms and receiving a cancer  
148 diagnosis, and had suboptimal care experiences.

149 **S3 Fig. Emergent themes relevant to cancer patients and family members' experience during the**  
150 **diagnostic period**

### 151 **Potentially avoidable delays**

152 Participants referred to potentially avoidable long periods of time spent in the diagnostic period. They  
153 mentioned delays related to the patient, to the doctor, and to the health system.

154

155 Patient-related delays. Initial inaction by patients caused delays. Patients did not initially act because  
156 they did not identify symptoms or did not think symptoms were signs of a serious problem. An  
157 additional cause of delay was that patients postponed visits with their doctor due to fear of cancer,  
158 being busy, feeling embarrassed or not feeling it was an appropriate use of the doctor's time.

159

160 Having some degree of awareness about the seriousness of symptoms, and knowing individuals who had  
161 experienced cancer played a very important role in acknowledging the problem and deciding to go to

162 the doctor promptly after noticing a symptom. As this participant explained it: “A friend from the  
163 community had [breast cancer] and died of it. So, I felt this lump. As soon as we got home, I made an  
164 appointment” [breast cancer patient 10].

165  
166 Family doctor-related delays. In some cases, participants reported that they believed that their doctor’s  
167 inability to identify symptoms led to patients undergoing investigation for diseases other than cancer, or  
168 a later visit to the emergency department. One participant explained this delay in eventually  
169 investigating and identifying cancer as: “she just developed this cough. It wouldn’t go away. We took her  
170 to the doctor and just said it’s allergies [...]. Several months went by, and she wasn’t any better. We  
171 went to the doctor again and again before even thinking of cancer” [relative of lung and brain cancer  
172 patient 12].

173  
174 Participants perceived family doctors as the patients’ doorway to the diagnostic pathway. In the context  
175 of their experience, some participants referred to their family doctor as the person who restricted  
176 access to the investigation of cancer symptoms and jeopardized a timely diagnosis. One explained: “I  
177 guess it couldn’t be cancer if [the doctor] didn’t even check for it” [breast cancer patient 2], and:

178 “It isn’t until [doctors] are convinced something is wrong, nothing is going to happen [...]. It was  
179 not until we did the private MRI that we found out [she had cancer]. That triggered the doctor  
180 really believing that something was wrong and doing something about her cancer” [relative of  
181 lung cancer patient 3].

182  
183 In some cases, participants debated about the role of family doctors and agreed that doctors could play  
184 a bigger role at supporting patients in navigating the healthcare system. One participant, reflecting on

185 her experience, said: “I’ve had this family doctor for many years [...]. I felt that he should have been  
186 more involved in getting things moving quicker” [colon cancer patient 14].

187  
188 System-related delays. Long waiting times to see a specialist, undergo testing or learn test results  
189 delayed diagnosis. Some participants spent extensive time following the multiple steps involved in the  
190 investigation. They shared frustration with what they reflected to be an uncoordinated and inefficient  
191 process. A few shared that there was not much they could have done about it, while others expressed  
192 that “there’s a responsibility for [patients] to be more proactive” [ovarian cancer patient 4]. As  
193 explained by this participant:

194 “In my case, people doing the test didn’t follow through. So, that process was dropped. But I still  
195 had those symptoms, so we should have done more investigation. I had to be assertive enough  
196 to say to the doctor: ‘I need this exam’” [colon cancer patient 15].

197  
198 Being familiar with cancer and having system connections or being knowledgeable about how the  
199 system works were mentioned as enablers for self-advocacy during the diagnostic period and prompt  
200 diagnosis. One participant explained, for example:

201 “I was phoning and trying not to harass, but I knew what my options were, what I can do. I  
202 remember phoning my family doctor and, you know, ‘can you get us in?’ to get a colonoscopy  
203 earlier. Unless you are an advocate, you get lost in the system” [relative of lung cancer patient  
204 2].

## 205 **Concerns about health status**

206 Participants mentioned that it was stressful to consider the possibility of a major health condition such  
207 as cancer. In most cases, family members were mentioned as the primary source of emotional support.  
208 Some participants also assigned an emotional supporting role to family physicians: “they could be the

209 hub, supporting the patient” [prostate cancer patient 5]. In terms of the timing of health concerns, most  
210 participants mentioned that before the investigation “you want to trivialize it, it’s not a big deal” [breast  
211 cancer patient 1], but once the investigation process started, they began to consider the possibility of a  
212 serious health problem.

213

214 Participants shared three elements that triggered being concerned about a serious health problem. First,  
215 the fact that their family doctor decided to pursue testing or referral to a specialist prompted worries. “I  
216 thought: ‘nobody was too worried about it until now, why do I have to go [to the specialist] suddenly?’  
217 So I became worried” [anal cancer patient 18]. Second, the realization that the investigation was not as  
218 straightforward as they thought caused concerns. “It was scary; Dr. [name] sent us for blood tests again,  
219 and the scans, that was like two days” [relative of prostate cancer patient 5]. Third, the existence or  
220 non-existence of communication with healthcare providers during the investigation caused patients to  
221 worry about their health. “I was having the mammogram, the radiologist was there. She showed me  
222 what she saw on the screen and she said: ‘this is what I am looking at’, and I’m concerned about that”  
223 [breast cancer patient 17]. “A lot of cancer people say that at the radiology place, when they are doing  
224 [a mammogram], the radiologist often comes in and explains; they can often tell right away. But  
225 nothing, that did not happen, and I’m worried” [breast cancer patient 1].

## 226 **Misunderstood investigation process**

227 The process of investigation was described differently by participants who accessed care through the  
228 emergency department and those who accessed care through their family doctor. Participants who  
229 went to the emergency department described the investigation as “very abrupt, instantaneous and with  
230 no stress, because it was right away” [breast cancer patient 2]. In several cases, participants who saw  
231 their doctor and had the investigation initiated by their doctor explained that the investigation was  
232 cumbersome and stressful. They referred to specific complications such as having tests done multiple



233 times or having to travel to inconvenient locations for medical appointments, and also to the fact that it  
234 involved multiple steps that were often unexpected and seemed uncoordinated. As explained by this  
235 participant: “I just thought I was gonna go in for a mammogram [...]. I went for my mammogram and I  
236 thought everything would be fine, but they called me back and they said: ‘we need to see you again’”  
237 [breast cancer patient 10]. What seemed particularly stressful for participants was the fact they did not  
238 understand what the investigation process entailed, and were unsure about what to expect. As  
239 explained by one participant:

240 “There didn’t seem to be a plan, really. I mean, I know they have a plan because that’s what  
241 they’ve done a million times before, but they don’t share that too much other than to say: ‘we  
242 are going to do a biopsy or whatever test’. There is not a whole lot of explanation [...]. I was just  
243 following what they were saying, and I was: ‘ok, I’ll just show up there for that appointment and  
244 do that’” [breast cancer patient 16].

245  
246 After reflecting on how challenging it had been for them to navigate the investigation process, some  
247 participants stressed that others might struggle. In particular, they referred to patients from cultural  
248 minorities, elderly, with less education or other characteristics that may impact their ability to advocate  
249 for themselves. “Where am I supposed to go? People don’t have a clue; [...] you feel lost, it’s very scary”,  
250 and “I kept saying: ‘if you were an immigrant coming in here, how would you ever figure all this out?’”  
251 [anal cancer patient 18]. Participants emphasized the importance of having family members who can  
252 support patients, and the need to improve the coordination of services and have resources available to  
253 patients: “whether it be a nurse navigator, whether it be some written information, or like just  
254 somebody to tell you: ‘this is what [the investigation process] looks like and these are the timelines’”  
255 [breast cancer patient 6].

256

## 257 Discussion

258 The study described the diagnostic period from the perspective of a group of patients with cancer and  
259 family members in Alberta. Findings contribute to the literature by focusing on perceived challenges  
260 along the pathway to diagnosis, and thus may have implications for the development of interventions to  
261 improve the experiences of patients and family members. Of relevance, findings showed that patients  
262 and family members participating in the study experienced anxiety and had suboptimal experiences.  
263 Participants expressed the importance of self-advocacy and wanting to have an active role in their care,  
264 and suggested unmet supportive care needs when navigating the system. These findings highlight a  
265 need for further discussion on the provision of psychosocial supports to potential cancer patients and  
266 their families before they have a confirmed diagnosis of cancer.

267

268 The finding of participants feeling distressed during this period is consistent with previous studies  
269 undertaken in various countries including the United States, Denmark and Canada [13, 18]. Before  
270 diagnosis, individuals with symptoms suspicious of cancer face uncertainty and threat of a serious illness  
271 while having to undergo medical appointments and tests, which might be fearsome, uncomfortable and  
272 demanding. Findings from the study are also in alignment with the literature by indicating that fear  
273 about having a serious health condition is an important cause of anxiety among patients and family  
274 members waiting for diagnosis [24]. Also in accordance with the literature, findings showed that  
275 perceived long timelines add stress to an already stressful situation [25]. Consistent with previous  
276 research, participants associated delays with their inaction or late action in seeking medical attention  
277 [6], with their doctor's failure to correctly identify cancer symptoms [12, 26], and with system  
278 inefficiencies including variable access to specialists and testing and limited coordination of care [27,  
279 28]. Of relevance, participants in the study referred to cancer awareness and second-hand experience

280 with cancer as two important elements supporting the patient’s prompt consult with a doctor. While the  
281 relevance of cancer awareness has been previously acknowledged [29, 30], the influence of shared  
282 cancer stories on the experiences of potential cancer patients with the diagnostic period has not been  
283 discussed in the literature. In the post-diagnosis literature, access to patients’ real experiences with the  
284 disease has been reported important in providing general support to patients with cancer including the  
285 provision of information related to cancer and care process, and emotional help [31, 32]. The potential  
286 role of the socialization of these experiences in not just helping individuals seek medical attention, but  
287 also dealing with information and emotional aspects of a prospective cancer diagnosis at the beginning  
288 of their journey requires further investigation.

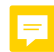

289  
290 A relevant contribution from our study is the importance of self-advocacy and the need to better  
291 support patients and family members acquire an active role in their care prior to receiving a cancer  
292 diagnosis. Similar to what has been documented in the post-diagnosis literature [33], participants in the  
293 study referred to the concept of ‘patient activation’ [34]. They articulated their need or willingness and  
294 ability to take independent actions to manage their health and care throughout the diagnostic period.  
295 Similar to what has been discussed in the context of treatment and survivorship [35], the healthcare  
296 system, even in the pre-diagnosis period, is increasingly complex, with a growing number and variety of  
297 specialties, care delivery sites, and diagnostic tests. In the face of navigating these complexities, and in  
298 the context of the psychological burdens of potentially facing cancer it is not surprising that many  
299 patients and families find crucial to advocate for getting their care needs met [32]. In order to fully  
300 benefit from the care available to them and have improved experiences, patients and families promote  
301 their own interests and actively try to avoid situations such as delayed appointments with a specialist or  
302 delayed access to appropriate testing.

303

304 As acknowledged by participants and supported by previous research, in order to be able to advocate  
305 for themselves, patients and family members need to be involved with individuals and groups that  
306 support their interests [32, 33]. Unlike post-diagnosis, before diagnosis patients are not “cancer  
307 patients” yet and they and their family members do not hold membership into particular patient/family  
308 groups that can provide this support, leaving healthcare providers as the main group who can do it.  
309 While at post-diagnosis stages oncology care teams are an important source of support to patients and  
310 families [36], before diagnosis patients expect this role to be played by family doctors. Family doctors in  
311 Canada play a key role in helping to manage and coordinate care for patients before and after diagnosis  
312 [37], and as suggested by our findings their engagement from the beginning of the patients’ journey in  
313 helping them navigate the diagnostic period and advocating for them when required is important. We  
314 heard from participants that it is important for patients/families to feel that family doctors are on their  
315 side and support them. Family doctors can support patient and family members willing to engage in self-  
316 advocacy behaviours by trying to establish deeper connections with them and adequately informing  
317 them. As reported in previous research, family doctors are a primary source of information during the  
318 diagnostic period [15], and patients need to feel adequately informed in order for them to participate  
319 effectively in making decisions throughout the diagnostic period [32]. Based on our findings, optimal  
320 attention to patient and family needs may include hearing their concerns, providing them with regular  
321 updates on the investigation process, engaging in discussions of expectations about the different steps  
322 involved in the diagnostic period, and assessing their understanding of these conversations. Finding  
323 ways to promote and support family doctors in the care of potential cancer patients throughout the  
324 diagnostic period and equipping them with the skills and tools required to better support them should  
325 be explored further.

## 326 **Limitations**

327 The findings of this study should be considered in light of some limitations. First, the study was not  
328 longitudinal and results are particular to the time frame the interviews were conducted. Distress and  
329 recovery from the diagnostic period is a dynamic process, the perspectives of patients and family  
330 members would likely be different at an earlier or later point in time. Their perceptions may have  
331 changed as more time elapsed since the date of diagnosis. Second, the information was collected  
332 retrospectively and data might be subject to memory recall errors. Finally, as in any study involving self-  
333 reported data, results may be subject to exaggeration and attribution. Despite these limitations, results  
334 from this exploratory study provide important contributions to this area given the limited number of  
335 studies focused on perceived timelines and challenges during the diagnostic period.

336

## 337 **Conclusion**

338 In an effort to streamline the diagnostic period in Alberta, Alberta Health Services and other  
339 stakeholders have established streamlined diagnostic programs for breast, lung and prostate cancers  
340 [38-40]. The Cancer Strategic Clinical Network is currently initiating a program to establish an Alberta  
341 Facilitated Cancer Diagnosis Strategy that goes across cancer sites and geographies in the province. Our  
342 study asked patients and family members in the province about their experience from symptom to  
343 cancer diagnosis and found that they struggled emotionally. Findings complement quantitative studies  
344 that described long and variable periods from suspicion to diagnosis for different cancers [8-10].  
345 Findings suggested that from the perspectives of patients and family members shorter times to  
346 diagnosis are desirable, but many additional factors also need to be considered for improved  
347 satisfaction with care. Supporting individuals deal with a prospective cancer diagnosis by facilitating  
348 access to lived experiences with the diagnostic process and cancer, and enhancing the supportive role of

349 family doctors may improve outcomes for patients and family members. Although this study helps shed  
350 light on how to improve the experiences of patients and family members during the diagnostic period,  
351 more work is required to understand how some of the psychosocial supports available to cancer  
352 patients after diagnosis could be used to support these patients and their families before diagnosis.

353

## 354 Acknowledgements

355 The authors acknowledge the Patient & Family Advisor Network (CancerControl Alberta) for their  
356 assistance in recruiting participants, and feedback on data collection protocol; Debora Allatt, Lorelee  
357 Marin, Frances Cusano, and Charlie Fischer for their feedback; and study participants for their insights.

358

## 359 References

- 360 1. Statistics Canada. The 10 leading causes of death, 2012. Ottawa, ON: Statistics Canada; 2015  
361 [cited 2018 January 9]; Available from: [http://www.statcan.gc.ca/pub/82-625-x/2015001/article/14296-  
362 eng.htm](http://www.statcan.gc.ca/pub/82-625-x/2015001/article/14296-<br/>362 eng.htm).
- 363 2. Canadian Cancer Statistics Advisory Committee. Canadian cancer statistics 2019. Toronto, ON:  
364 Canadian Cancer Society 2019.
- 365 3. Neal RD, Tharmanathan P, France B, Din NU, Cotton S, Fallon-Ferguson J, et al. Is increased time  
366 to diagnosis and treatment in symptomatic cancer associated with poorer outcomes? Systematic review.  
367 Br J Cancer 2015 Mar 31;112:S92-S107.
- 368 4. Butler J, Foot C, Bomb M, Hiom S, Coleman M, Bryant H, et al. The International Cancer  
369 Benchmarking Partnership: An international collaboration to inform cancer policy in Australia, Canada,  
370 Denmark, Norway, Sweden and the United Kingdom. Health Policy 2013 Sep;112(1-2):148-55.

371 5. Maringe C, Walters S, Rachet B, Butler J, Fields T, Finan P, et al. Stage at diagnosis and colorectal  
372 cancer survival in six high-income countries: A population-based study of patients diagnosed during  
373 2000-2007. *Acta Oncol*2013 Jun;52(5):919-32.

374 6. Brousselle A, Breton M, Benhadj L, Tremblay D, Provost S, Roberge D, et al. Explaining time  
375 elapsed prior to cancer diagnosis: Patients' perspectives. *BMC Health Serv Res*. [Article]. 2017  
376 Jun;17:448.

377 7. Li X, Scarfe A, King K, Fenton D, Butts C, Winget M. Timeliness of cancer care from diagnosis to  
378 treatment: A comparison between patients with breast, colon, rectal or lung cancer. *International*  
379 *Journal of Quality Health Care*2013 Apr;25(2):197-204.

380 8. Kim JO, Davis F, Butts C, Winget M. Waiting time intervals for non-small cell lung cancer  
381 diagnosis and treatment in Alberta: Quantification of intervals and identification of risk factors  
382 associated with delays. *Clin Oncol*2016 Dec;28(12):750-9.

383 9. Yuan Y, Li M, Yang J, Elliot T, Dabbs K, Dickinson JA, et al. Factors related to breast cancer  
384 detection mode and time to diagnosis in Alberta, Canada: A population-based retrospective cohort  
385 study. *BMC Health Serv Res*2016 Feb 19;16.

386 10. Sikdar KC, Dickinson J, Winget M. Factors associated with mode of colorectal cancer detection  
387 and time to diagnosis: A population level study. *BMC Health Serv Res*2017 Jan 5;17.

388 11. Grunfeld E. It takes a team CanIMPACT: Canadian team to improve community-based cancer  
389 care along the continuum. *Can Fam Physician*. [Editorial Material]. 2016 Oct;62(10):781-2.

390 12. Weller D, Vedsted P, Anandan C, Zalounina A, Fourkala EO, Desai R, et al. An investigation of  
391 routes to cancer diagnosis in 10 international jurisdictions, as part of the International Cancer  
392 Benchmarking Partnership: Survey development and implementation. *BMJ Open*2016 2016;6(7).

- 393 13. Miles A. The psychological implications of diagnostic delay in colorectal cancer patients. In:  
394 Olsson L, editor. *Timely Diagnosis of Colorectal Cancer* Cham, Switzerland: Springer International  
395 Publishing; 2017. p. 103-19.
- 396 14. Brocken P, Heijden EHF, Oud KTM, Bootsma G, Groen HJM, Donders ART, et al. Distress in  
397 suspected lung cancer patients following rapid and standard diagnostic programs: A prospective  
398 observational study. *Psychooncology*. [Article]. 2015;24(4):433-41.
- 399 15. Wiljer D, Walton T, Gilbert J, Boucher A, Ellis PM, Schiff S, et al. Understanding the needs of lung  
400 cancer patients during the pre-diagnosis phase. *J Cancer Educ*2012;27(3):494-500.
- 401 16. Jonikas J, Grey D, Copeland M, Razzano L, Hamilton M, Floyd C, et al. Improving propensity for  
402 patient self-advocacy through wellness recovery action planning: Results of a randomized controlled  
403 trial. *Community Ment Health J*2013;49(3):260-9.
- 404 17. Patton MQ. *Qualitative research & evaluation methods. Integrating theory and practice*. Saint  
405 Paul, MN: SAGE Publications, Inc; 2015.
- 406 18. Weller D, Vedsted P, Rubin G, Walter FM, Emery J, Scott S, et al. The Aarhus statement:  
407 Improving design and reporting of studies on early cancer diagnosis. *Br J Cancer*2012 Mar  
408 27;106(7):1262-7.
- 409 19. Walter F, Webster A, Scott S, Emery J. The Andersen Model of Total Patient Delay: a systematic  
410 review of its application in cancer diagnosis. *J Health Serv Res Policy*2012 Apr;17(2):110-8.
- 411 20. Scott SE, Walter FM, Webster A, Sutton S, Emery J. The model of pathways to treatment:  
412 conceptualization and integration with existing theory. *British Journal of Health Psychology*2013  
413 Feb;18(1):45-65.
- 414 21. Denzin N, Lincoln Y. *The SAGE handbook of qualitative research* 5th ed. Thousand Oaks, CA:  
415 SAGE Publications, Inc; 2018.



- 416 22. Creswell J. Research design: Qualitative, quantitative, and mixed methods approaches:  
417 Thousand Oaks: Sage Publications; 2014.
- 418 23. Miles MB, Huberman MA, Saldana J. Qualitative data analysis: A methods sourcebook. 3rd ed.  
419 Thousand Oaks, CA: SAGE Publications, Inc; 2014.
- 420 24. Brocken P, Prins JB, Dekhuijzen PNR, van der Heijden HFM. The faster the better?-A systematic  
421 review on distress in the diagnostic phase of suspected cancer, and the influence of rapid diagnostic  
422 pathways. *Psychooncology*. [Article]. 2012;21(1):1-10.
- 423 25. Miles A, McClements PL, Steele RJC, Redeker C, Sevdalis N, Wardle J. Perceived diagnostic delay  
424 and cancer-related distress: A cross-sectional study of patients with colorectal cancer. *Psychooncology*.  
425 [journal article]. 2017;26(1):29-36.
- 426 26. Macleod U, Mitchell ED, Burgess C, Macdonald S, Ramirez AJ. Risk factors for delayed  
427 presentation and referral of symptomatic cancer: Evidence for common cancers. *Br J Cancer* 2009 Dec  
428 3;101 Suppl 2:S92-s101.
- 429 27. Barisic A, Kish M, Gilbert J, Mittmann N, Moineddin R, Sisler J, et al. Family physician access to  
430 and wait times for cancer diagnostic investigations: Regional differences among 3 provinces. *Can Fam*  
431 *Physician*. [Article]. 2016 Oct;62(10):E599-E607.
- 432 28. Brouwers MC, Vukmirovic M, Tomasone JR, Grunfeld E, Urquhart R, O'Brien MA, et al.  
433 Documenting coordination of cancer care between primary care providers and oncology specialists in  
434 Canada. *Can Fam Physician*. [Article]. 2016 Oct;62(10):E616-E25.
- 435 29. Richards MA. The national awareness and early diagnosis initiative in England: Assembling the  
436 evidence. *Br J Cancer* 2009 Dec;101:S1-S4.
- 437 30. Quaife SL, Forbes LJJ, Ramirez AJ, Brain KE, Donnelly C, Simon AE, et al. Recognition of cancer  
438 warning signs and anticipated delay in help-seeking in a population sample of adults in the UK. *Br J*  
439 *Cancer*. [Article]. 2014(1):12.

- 440 31. Lawler M, Prue G, Banks I, Law K, Selby P, McVie G, et al. Mapping the cancer patient  
441 information landscape: A comparative analysis of patient groups across Europe and North America. *Eur J*  
442 *Cancer*. [Article]. 2018 03/01/March 2018;92:88-95.
- 443 32. Hagan TL, Rosenzweig MQ, Zorn KK, van Londen GJ, Donovan HS. Perspectives on self-advocacy:  
444 Comparing perceived uses, benefits, and drawbacks among survivors and providers. *Oncol Nurs*  
445 *Forum*2017;44(1):52-9.
- 446 33. Hagan TL, Donovan HS. Self-advocacy and cancer: A concept analysis. *J Adv*  
447 *Nurs*2013;69(10):2348-59.
- 448 34. Hibbard JH, Stockard J, Mahoney ER, Tusler M. Development of the Patient Activation Measure  
449 (PAM): Conceptualizing and Measuring Activation in Patients and Consumers. *Health Serv Res*. [Article].  
450 2004;39(4p1):1005-26.
- 451 35. Gruman J, Rovner MH, French ME, Jeffress D, Sofaer S, Shaller D, et al. From patient education  
452 to patient engagement: Implications for the field of patient education. *Patient Educ Couns*. [Article].  
453 2010 1/1/2010;78:350-6.
- 454 36. Brown R, Butow P, Wilson-Genderson M, Bernhard J, Ribi K, Juraskova I. Meeting the decision-  
455 making preferences of patients with breast cancer in oncology consultations: Impact on decision-related  
456 outcomes. *J Clin Oncol*2012;30(8):857-62.
- 457 37. Easley J, Miedema B, O'Brien MA, Carroll J, Manca D, Webster F, et al. The role of family  
458 physicians in cancer care: Perspectives of primary and specialty care providers. *Current Oncology*.  
459 [Article]. 2017 Apr;24(2):75-80.
- 460 38. Prostate Cancer Centre Calgary. Rapid Access Clinics (RAC). 2016 [cited 2019 September 9];  
461 Available from: [http://www.prostatecancercentre.ca/our-programs/patient-services/#rapid-access-](http://www.prostatecancercentre.ca/our-programs/patient-services/#rapid-access-clinics)  
462 [clinics](http://www.prostatecancercentre.ca/our-programs/patient-services/#rapid-access-clinics).

463 39. Tremblay A, Strilchuk N, Taghizadeh N, Fortin M, Burrowes P, Hampton L, et al. Radiologist  
464 initiated specialty referral for patients suspected of having a thoracic malignancy. Canadian Journal of  
465 Respiratory, Critical Care, and Sleep Medicine 2017;1(4):180-5.

466 40. Alberta Health Services. Comprehensive Breast Care Program. Alberta Health Services; 2018  
467 [cited 2018 January 22]; Available from:

468 <https://www.albertahealthservices.ca/info/service.aspx?id=1022658>.

469

470 **Supporting information**

471 **S1 Appendix. Semi-structured interview protocol (patients)**

472

473 **S2 Appendix. Semi-structured interview protocol (family members)**

474

475 **S3 Fig. Emergent themes relevant to cancer patients and family members' experience during the**  
476 **diagnostic period**

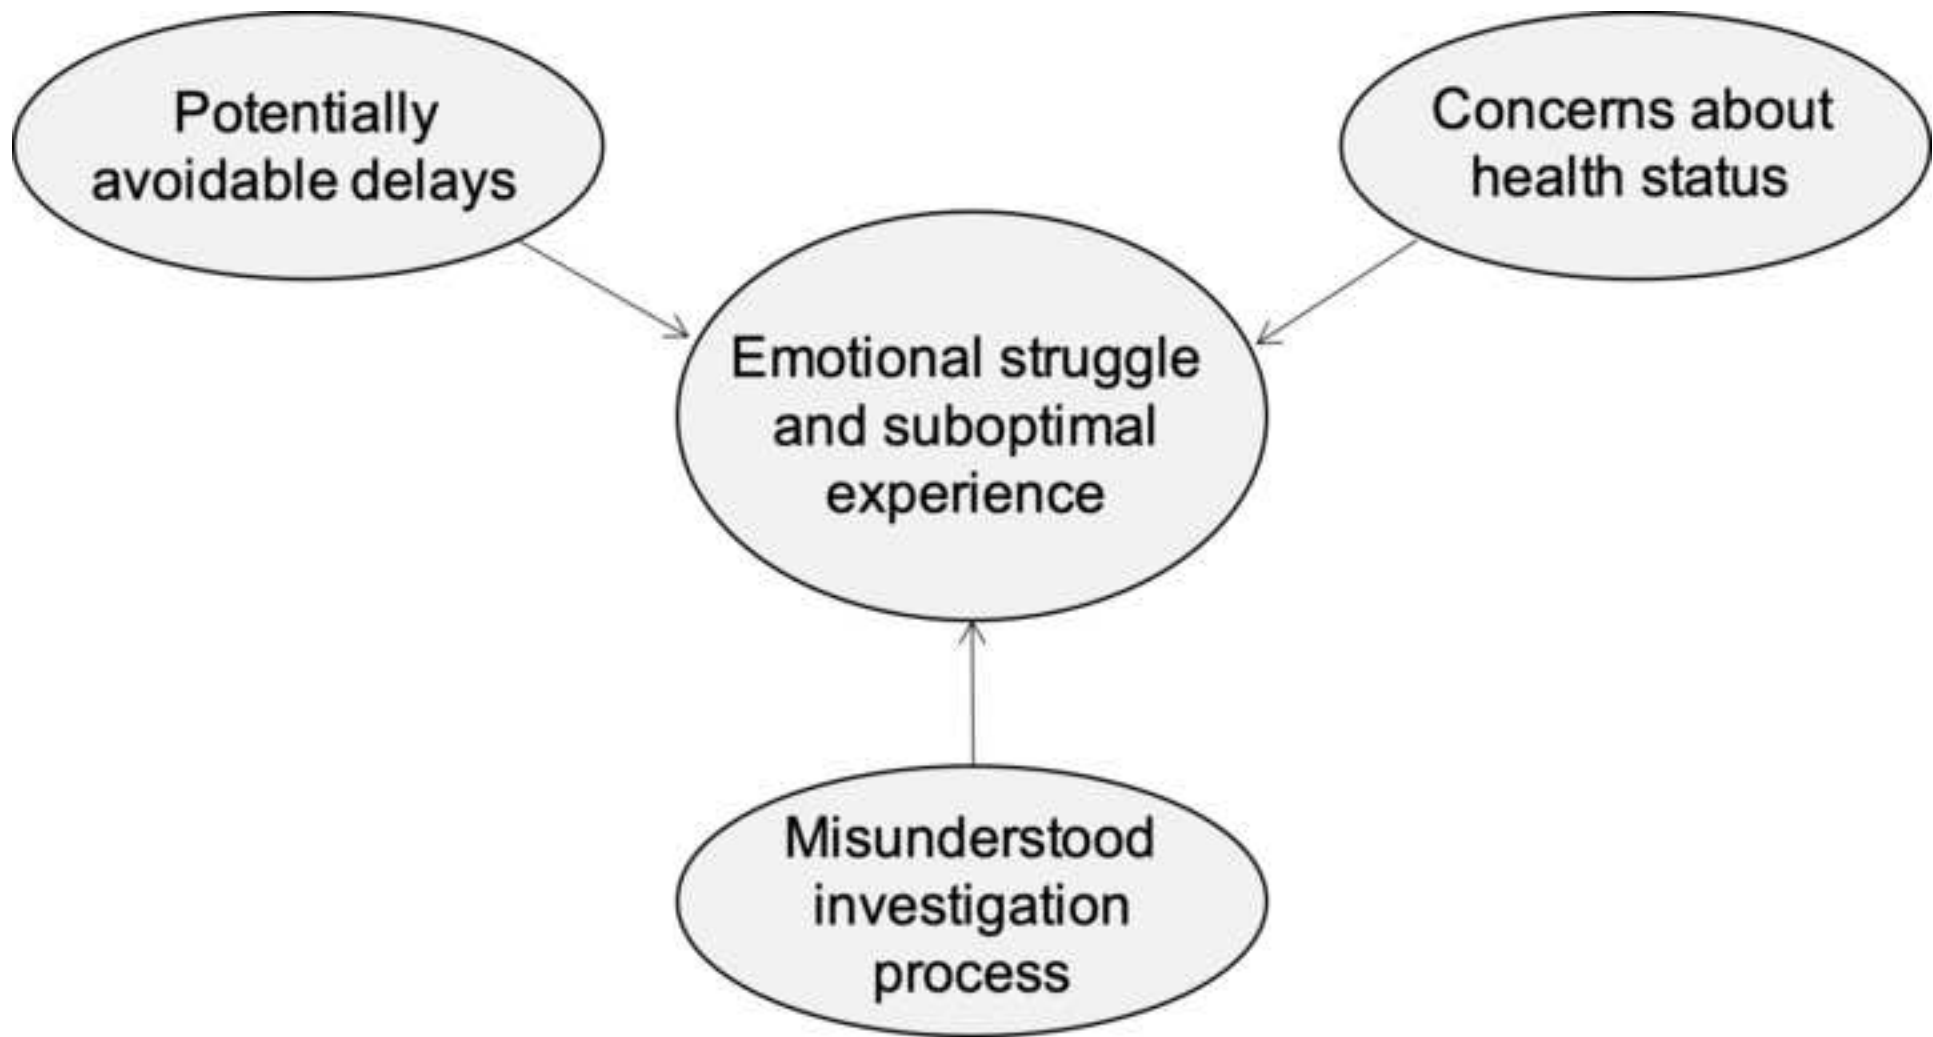

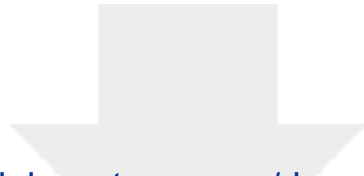

Click here to access/download  
**Supporting Information**  
S1\_Appendix.docx

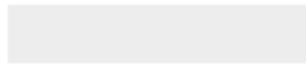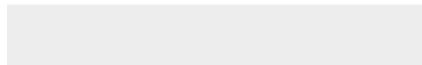



Click here to access/download  
**Supporting Information**  
S2\_Appendix.docx

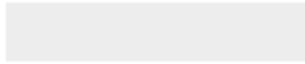

Supplement: pone.0239374.s005.pdf [file pone.0239374.s005.pdf]
